# Supplementary material for: Engineered Carbonic Anhydrase VI-Mimic Enzyme Switched the Structure and Affinities of Inhibitors
Source: PubMed Central journal article supplement (PMC6722136; doi:10.1038/s41598-019-49094-0), 2019-09-03
Supplement: 41598_2019_49094_MOESM1_ESM.pdf [file 41598_2019_49094_MOESM1_ESM.pdf]

# Engineered Carbonic Anhydrase VI-Mimic Enzyme Switched the Structure and Affinities of Inhibitors

*Justina Kazokaite<sup>a</sup>, Visvaldas Kairys<sup>b</sup>, Joana Smirnovienė<sup>a</sup>, Alexey Smirnov<sup>a</sup>, Elena Manakova<sup>c</sup>, Martti Tolvanen<sup>d</sup>, Seppo Parkkila<sup>e</sup>, and Daumantas Matulis<sup>a</sup>*

<sup>a</sup> - Department of Biothermodynamics and Drug Design, Institute of Biotechnology, Vilnius University, Saulėtekio 7, Vilnius LT-10257, Lithuania

<sup>b</sup> - Department of Bioinformatics, Institute of Biotechnology, Vilnius University, Saulėtekio 7, Vilnius LT-10257, Lithuania.

<sup>c</sup> - Department of Protein-DNA Interactions, Institute of Biotechnology, Vilnius University, Saulėtekio 7, Vilnius LT-10257, Lithuania

<sup>d</sup> Department of Information Technology, University of Turku, FI-20520, Turku, Finland

<sup>e</sup> Tampere University, Faculty of Medicine and Health Technology; Fimlab Ltd, Tampere University Hospital, Arvo Ylpön katu 34, FI-33520 Tampere, Finland

**Corresponding author:** Justina Kazokaite

Department of Biothermodynamics and Drug Design, Institute of Biotechnology,  
Vilnius University, Saulėtekio 7, Vilnius LT-10257, Lithuania

Tel: +37062490902

Email: [kazokaite@ibt.lt](mailto:kazokaite@ibt.lt)

## Supplementary

**Figure S1.** The structural alignment of CA II and CA VI sequences (UniProt codes CAH2\_HUMAN and CAH6\_HUMAN). The residues in the binding site and the mutated amino acids of CA II to design CA VI-mimic protein are indicated underneath the sequences. The binding site residues shown here correspond to the residues shown in Figure 1D.

|       |                                                           |     |
|-------|-----------------------------------------------------------|-----|
| CA II | M.....SHHWGYGK.HNGPEHWHKDFPIAKGERQSPVDIDTH                | 36  |
| CA VI | MRALVLLLSLFLGGQAQHVSDWTYSEGALDEAHWPQHYPACGGQRQSPINLQRT    | 55  |
| CA II | TAKYDPSLKPLSVSYDQ..ATSLRILNNGHAFNVFDDSQDKAVLKGPLDGTYR     | 89  |
| CA VI | KVRYNPSLKGLNMTGYETQAGEFPMVNNGHTVQISLPSIMRMTVADG...TVYI    | 106 |
| CA II | LIQFHFHWGSLD..GQGSEHTVDKKKYAAEELHLVHWNTKYGDFGKAVVQQPDGLAV | 142 |
| CA VI | AQQMHFHWGGASSEISGSEHTVDGIRHVIELIHVHYNKYKSYDIAQDAPDGLAV    | 161 |
| CA II | LGIFLKVGS..AKPGLQKVVDVLDSEIKTKGKSADFTNFDPRGGLPES.LDYWYYP  | 194 |
| CA VI | LAAFVEVKNYPENTYYSNFIHSLANIKYPGQRTTLTGLDVQDMLPRNLQHYTYH    | 216 |
| CA II | GSLTTPPLLECVTWIVLKEPISVSSEQVLKFRKLNFNAGEPEELMVDNWRPAQP    | 249 |
| CA VI | GSLTTPPCTENVHWFVLADFVKLSRTQVWKLNSLLDHR...NKTIHNDYRRTQP    | 268 |
| CA II | LKNRQIKASFK.....                                          | 260 |
| CA VI | LNHRVVESNFPNQEYTLGSEFQFYLHKIEEILDYLRRALN                  | 308 |

- conserved residues
- similar residues
- conserved residues in the binding site
- unconserved residues in the binding site (mutated in CA VI mimic)

**Figure S2.** Crystal structures described in this study. The electron density  $|F(o)-F(c)|$  of the ligands is calculated in the absence of ligand and contoured at  $3\sigma$ . Zinc ion is shown as blue sphere. (A) Compound EZA bound to CA VI-mimic (PDB ID 6QL2). (B) Compound **14** bound to CA VI-mimic (PDB ID 6QL1). (C) Compound **25** bound to CA VI-mimic (PDB ID 6QL3).

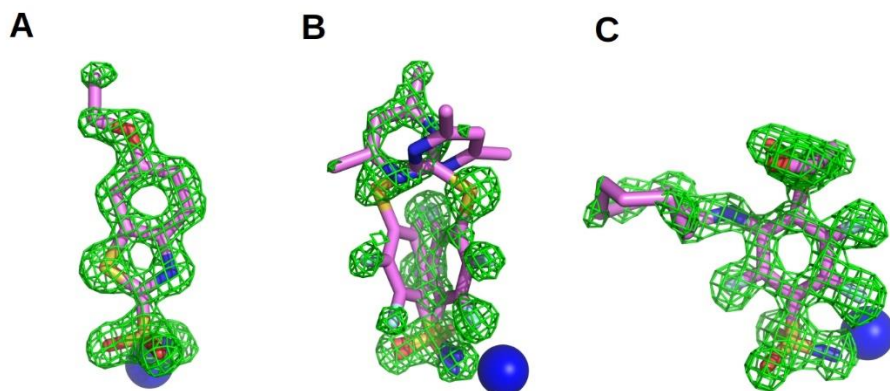

**Figure S3.** The plot of  $K_M$  dependence on pH for CA II (red squares), CA VI-mimic (wine triangles) and CA VI (royal circles).

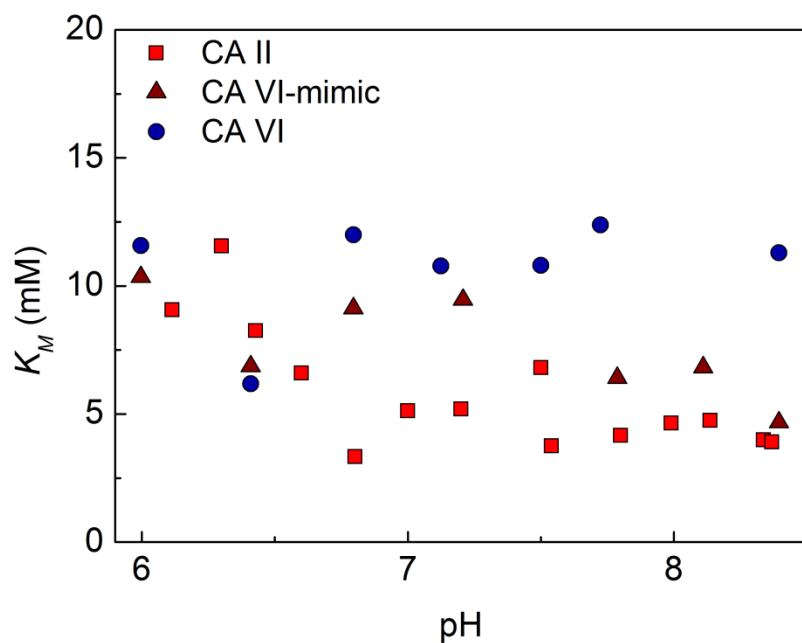

**Table S1.** Dissociation constants  $K_d$ s of selected compounds determined by SFA at pH 7.5, 23 °C.

| <b>Inhibitor</b> | <b>Lab. name</b> | <b>p<i>K<sub>a</sub></i><sub>SA</sub></b> | <b><i>K<sub>d</sub></i><sub>obs</sub> (nM)</b> |                    |              |
|------------------|------------------|-------------------------------------------|------------------------------------------------|--------------------|--------------|
|                  |                  |                                           | <b>CA II</b>                                   | <b>CA VI-mimic</b> | <b>CA VI</b> |
| <b>2.</b>        | EZA              | 7.82                                      | <2.5                                           | <25                | <25          |
| <b>14.</b>       | VD10-50          | 8.02                                      | <20                                            | 67                 | 290          |
| <b>23.</b>       | VD12-10          | 10.2                                      | <17                                            | 91                 | 1800         |
| <b>39.</b>       | E11-18           | 8.90                                      | <25                                            | 140                | 750          |
